# Supplementary material for: Reannotation and extended community resources for the genome of the non-seed plant Physcomitrella patens provide insights into the evolution of plant gene structures and functions
Source: PubMed Central journal article supplement (PMC3729371; doi:10.1186/1471-2164-14-498), 2013-07-23

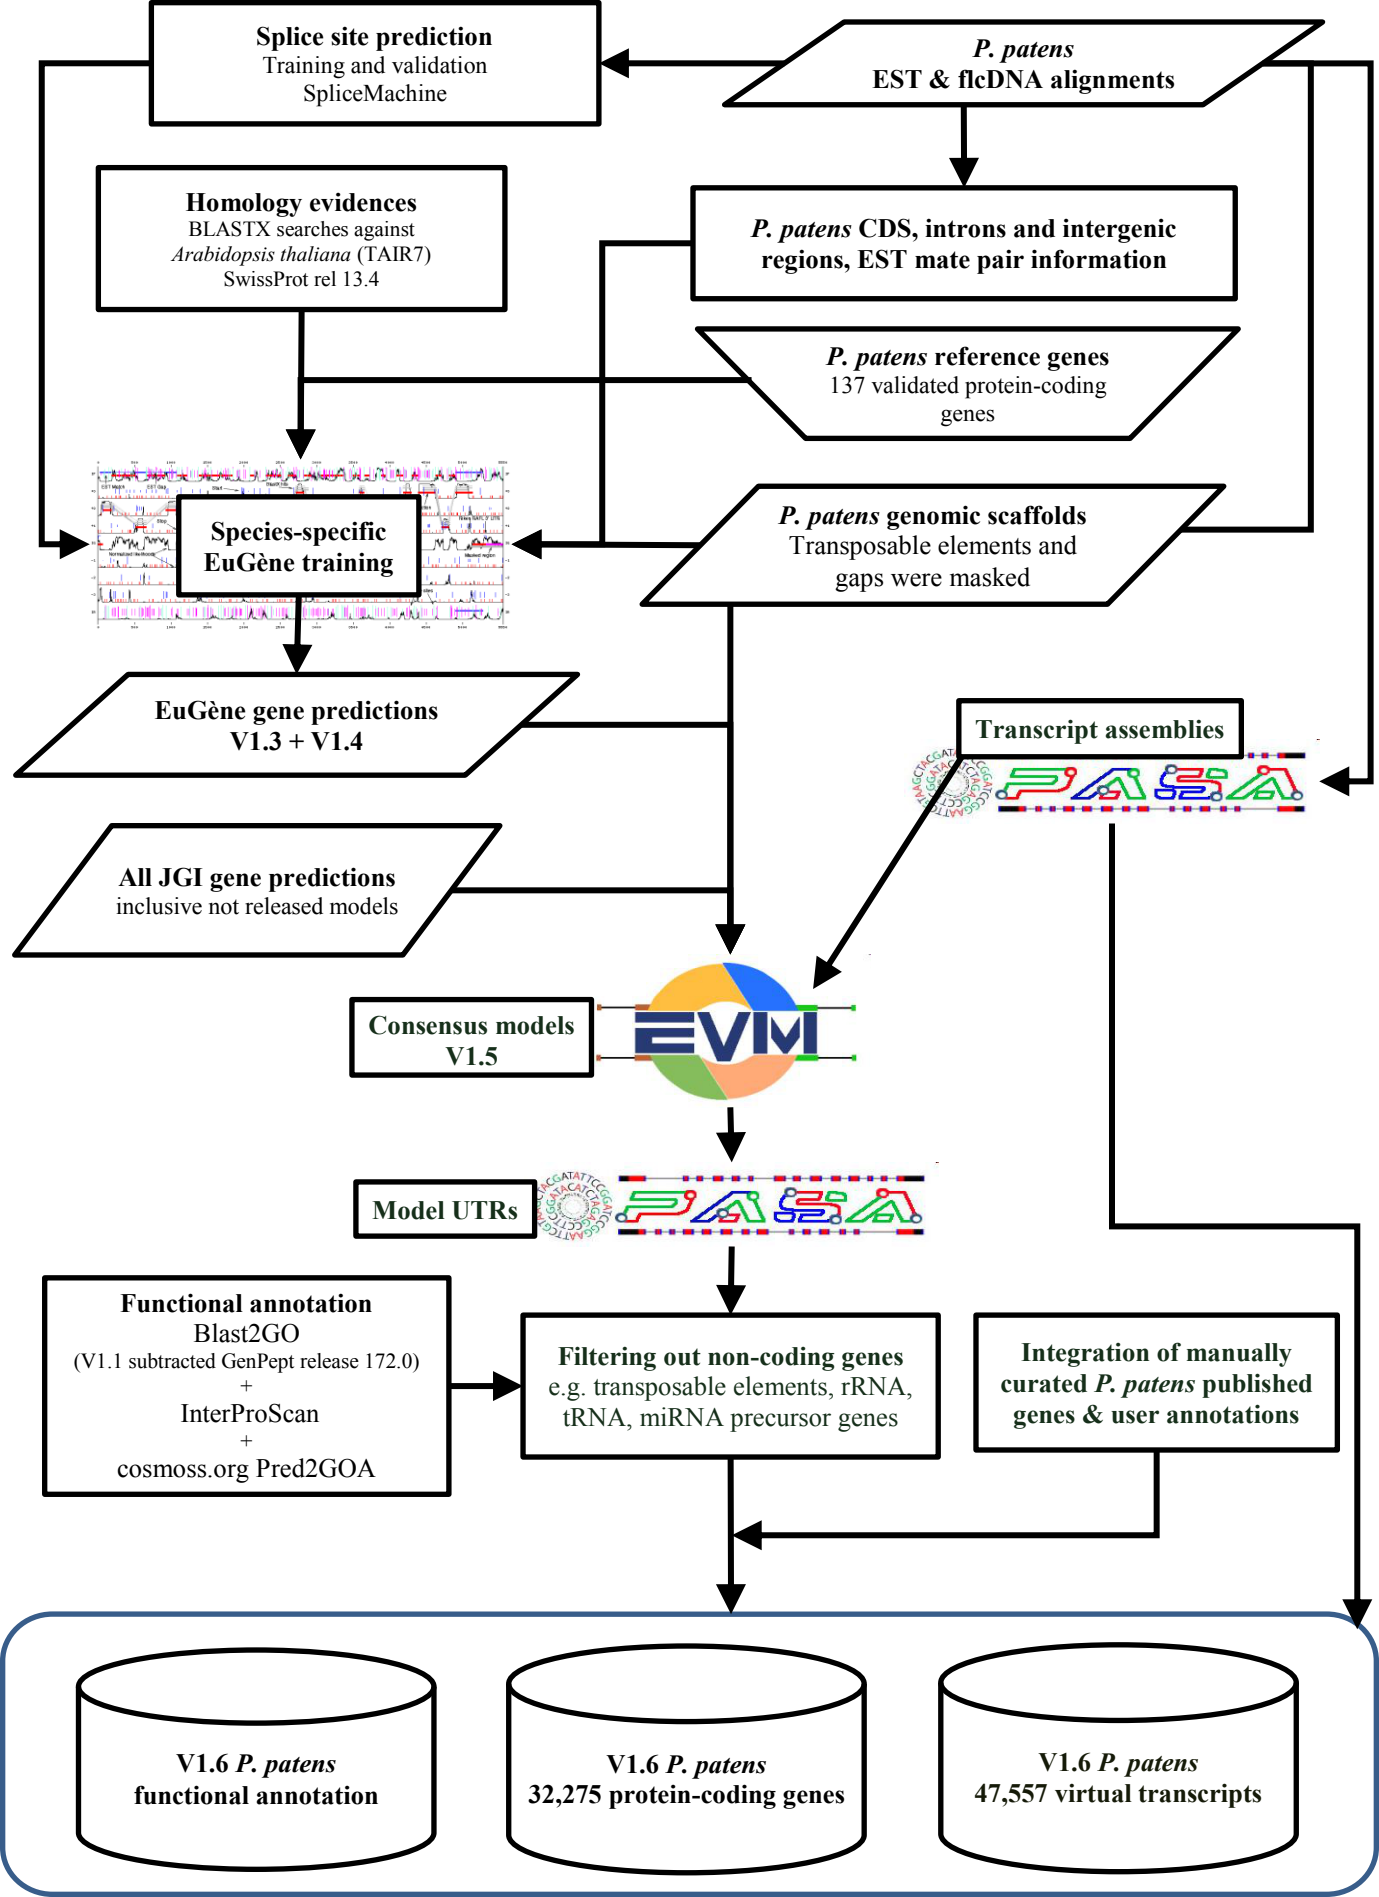

Supplement: 1471-2164-14-498-S3.pdf [file 1471-2164-14-498-S3.pdf]
